# Supplementary material for: Area and Resource Utilization of Group-Housed Horses in an Active Stable
Source: MDPI journal article supplement (doi:10.3390/ani11102777), 2021-09-23
Supplement: s1 [file s1]

# **Area and Resource Utilization of Group-Housed Horses in an Active Stable**

**Frederik Hildebrandt <sup>1,\*</sup>, Kathrin Büttner <sup>1,2</sup>, Jennifer Salau <sup>1</sup>, Joachim Krieter <sup>1</sup> and Irena Czycholl <sup>1</sup>**

<sup>1</sup> Institute of Animal Breeding and Husbandry, Kiel University, 24118, Kiel, Germany; kathrin.buettner@vet-med.uni-giessen.de (K.B.); jsalau@tierzucht.uni-kiel.de (J.S.); jkrieter@tierzucht.uni-kiel.de (J.K.); iczycholl@tierzucht.uni-kiel.de (I.C.)

<sup>2</sup> Unit for Biomathematics and Data Processing, Faculty of Veterinary Medicine, Justus Liebig University, 35392, Giessen, Germany

\* Correspondence: fhildebrandt@tierzucht.uni-kiel.de; Tel.: +49-431-880-1493

**Table S1.** Characteristics of the horses.

| Horse No. | Age | Sex | Breed                                     | Classification |
|-----------|-----|-----|-------------------------------------------|----------------|
| 1         | 19  | w   | Oldenburger                               | Warmblood      |
| 2         | 8   | w   | Hannoverian horse                         | Warmblood      |
| 3         | 16  | m   | German Riding Pony                        | Pony           |
| 4         | 22  | w   | Oldenburger                               | Warmblood      |
| 5         | 20  | m   | Arabian                                   | Other          |
| 6         | 14  | m   | Trotter                                   | Other          |
| 7         | 14  | m   | Arabian                                   | Other          |
| 8         | 7   | m   | Hannoverian horse                         | Warmblood      |
| 9         | 24  | w   | German Riding Pony                        | Pony           |
| 10        | 20  | w   | Trotter                                   | Other          |
| 11        | 10  | w   | Arabian                                   | Other          |
| 12        | 24  | m   | Paint Horse                               | Other          |
| 13        | 14  | m   | American Quarter Horse                    | Other          |
| 14        | 18  | w   | Hannoverian horse                         | Warmblood      |
| 15        | 5   | m   | Hannoverian horse                         | Warmblood      |
| 16        | 20  | m   | Andalusian horse                          | Other          |
| 17        | 21  | w   | Warmblood                                 | Warmblood      |
| 18        | 16  | m   | Holsteiner                                | Warmblood      |
| 19        | 29  | w   | Hannoverian horse                         | Warmblood      |
| 20        | 13  | m   | Mecklenburger                             | Warmblood      |
| 21        | 23  | m   | Cold-blooded horse x Arabian              | Other          |
| 22        | 10  | m   | Trakehner                                 | Warmblood      |
| 23        | 15  | w   | Oldenburger                               | Warmblood      |
| 24        | 11  | w   | Fjord                                     | Pony           |
| 25        | 8   | m   | Oldenburger                               | Warmblood      |
| 26        | 18  | m   | German Riding Pony                        | Pony           |
| 27        | 14  | m   | Brandenburger                             | Warmblood      |
| 28        | 12  | w   | Rhineland                                 | Warmblood      |
| 29        | 22  | w   | Westphalian horse                         | Warmblood      |
| 30        | 8   | m   | Holsteiner                                | Warmblood      |
| 31        | 8   | w   | Mecklenburger                             | Warmblood      |
| 32        | 24  | w   | Mecklenburger                             | Warmblood      |
| 33        | 25  | m   | Mecklenburger                             | Warmblood      |
| 34        | 17  | m   | Special riding horse (Welsh B/Holsteiner) | Other          |
| 35        | 17  | m   | Hannoverian horse                         | Warmblood      |
| 36        | 8   | m   | Hannoverian horse                         | Warmblood      |
| 37        | 12  | w   | Tennessee Walking Horse/Holsteiner        | Other          |
| 38        | 5   | m   | Trakehner                                 | Warmblood      |
| 39        | 9   | m   | Andalusian horse                          | Other          |
| 40        | 11  | w   | Holsteiner                                | Warmblood      |
| 41        | 12  | w   | Hannoverian horse                         | Warmblood      |
| 42        | 8   | m   | Holsteiner                                | Warmblood      |
| 43        | 9   | m   | Holsteiner                                | Warmblood      |
| 44        | 8   | m   | Haflinger                                 | Pony           |
| 45        | 8   | m   | German Riding Pony                        | Pony           |
| 46        | 20  | w   | Sachsen-Anhaltiner                        | Warmblood      |
| 47        | 2   | w   | Quarab                                    | Other          |
| 48        | 11  | m   | Hannoverian horse                         | Warmblood      |
| 49        | 4   | w   | Quarab                                    | Other          |

|    |    |   |             |           |
|----|----|---|-------------|-----------|
| 50 | 18 | m | Friesian    | Other     |
| 51 | 8  | w | Holsteiner  | Warmblood |
| 52 | 21 | w | Oldenburger | Warmblood |

---
